# Supplementary material for: Nanofibrillar Green Composites of Polylactide/Polyhydroxyalkanoate Produced in Situ Due to Shear Induced Crystallization
Source: PubMed Central journal article supplement (PMC6918183; doi:10.3390/polym11111811), 2019-11-04
Supplement: polymers-11-01811-s001.pdf [file polymers-11-01811-s001.pdf]

## Supplementary materials

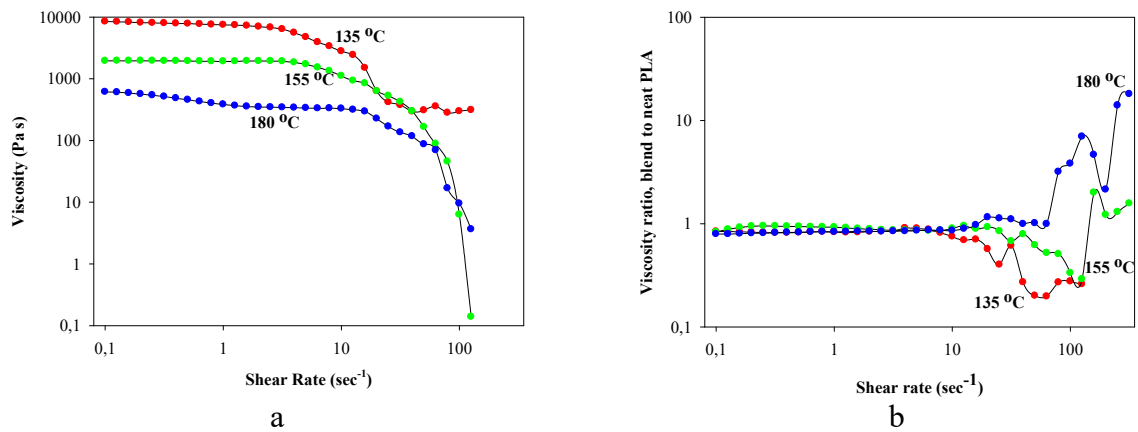

Fig. 1 a) Shear rate dependences of the complex viscosity for the matrix, PLA b) viscosity ratio of blend to matrix measured at 135, 155, 180 °C.

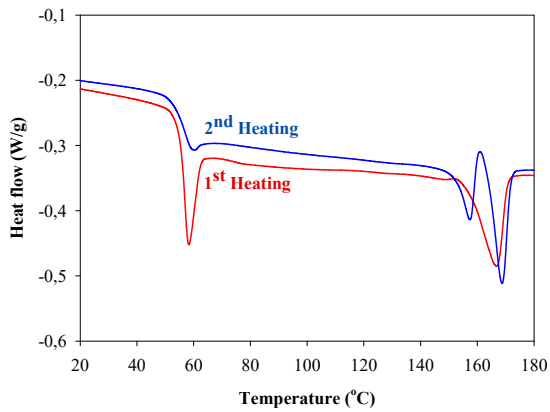

Fig. 2 Melting endotherm of PLA/PHA composite.

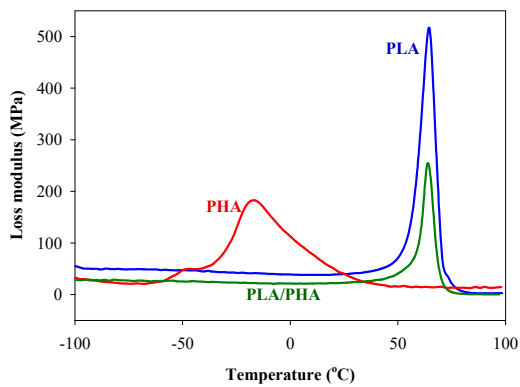

Fig. 3 Loss modulus of PLA, PHA and PLA/PHA composite in a tensile mode.

Table 1 Mechanical properties of PLA, PLA/PHA blend and composite

| Sample             | Young modulus, GPa | Yield stress, MPa | Stress at break, MPa | Strain at break, % |
|--------------------|--------------------|-------------------|----------------------|--------------------|
| PLA                | 2.04               | brittle fracture  | 43                   | 7.0                |
| PLA/PHA, blend     | 2.14               | 57                | 55                   | 7.4                |
| PLA/PHA, composite | 2.35               | 61                | 56                   | 28.1               |

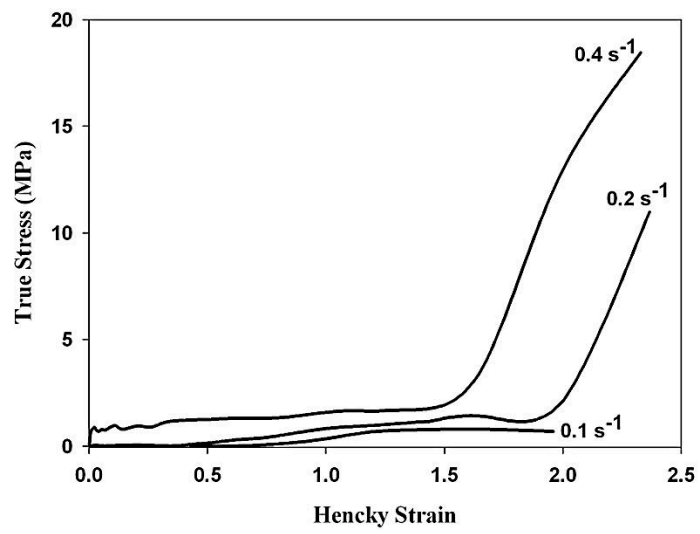

Fig. 4 True stress–Hencky strain curves of PHA nanofibers network for PLA/PHA nanocomposite determined at 100 °C and Hencky strain rates of 0.1, 0.2, and 0.4 sec<sup>-1</sup>. Plots obtained by subtracting stress-elongation curve for neat PLA from respective stress-elongation curves for the nanocomposite.
